# Supplementary material
Source: publisher figshare collection journal article supplement (https://acs.figshare.com/ndownloader/files/10090131)
Supplement: Supplementary file 1 [file 10090131]

# Supporting Information

## Laser Printed In-plane Micro-supercapacitors: From Symmetric to Asymmetric Structure

*Gui-Wen Huang,<sup>a</sup> Na Li,<sup>a</sup> Yi Du,<sup>a,c</sup> Qing-Ping Feng,<sup>a,\*</sup> Hong-Mei Xiao,<sup>a,\*</sup> Xing-Hua*

*Wu,<sup>a,c</sup> and Shao-Yun Fu<sup>b</sup>*

<sup>a</sup>Technical Institute of Physics and Chemistry, Chinese Academy of Sciences, No. 29 Zhongguancun East Road, Beijing 100190, P. R. China

<sup>b</sup>College of Aerospace Engineering, Chongqing University, Chongqing 400044, China

<sup>c</sup>University of Chinese Academy of Sciences

\* Q. P. Feng. E-mail: fengqp@mail.ipc.ac.cn.

\* H. M. Xiao. E-mail: hmxiao@mail.ipc.ac.cn.

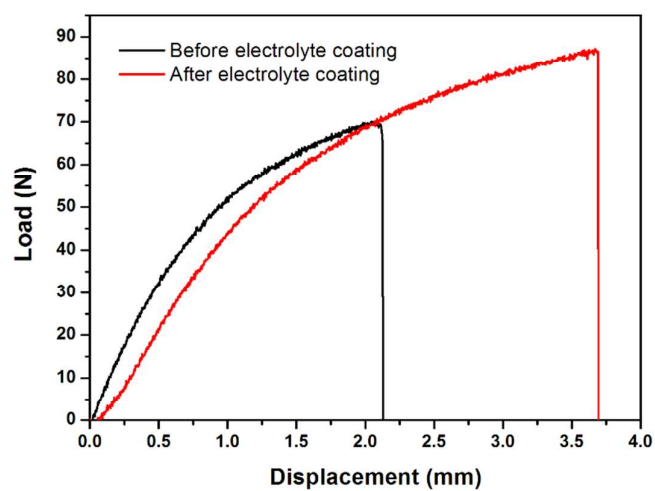

**Figure S1.** Tensile tests of the paper-based MSCs before and after electrolyte coating.

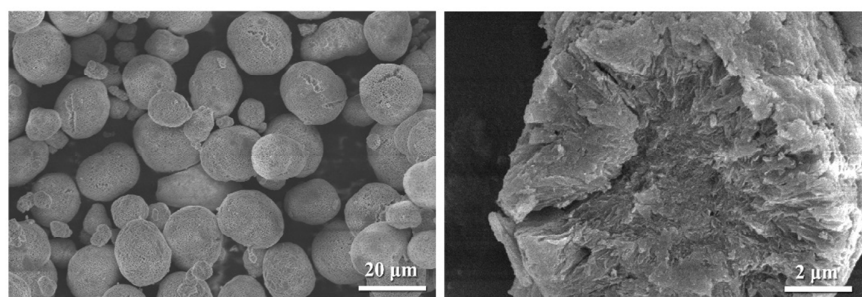

**Figure S2.** SEM images of the  $\alpha$ -Ni(OH)<sub>2</sub> particles (left) and the internal structure of one particle (right).

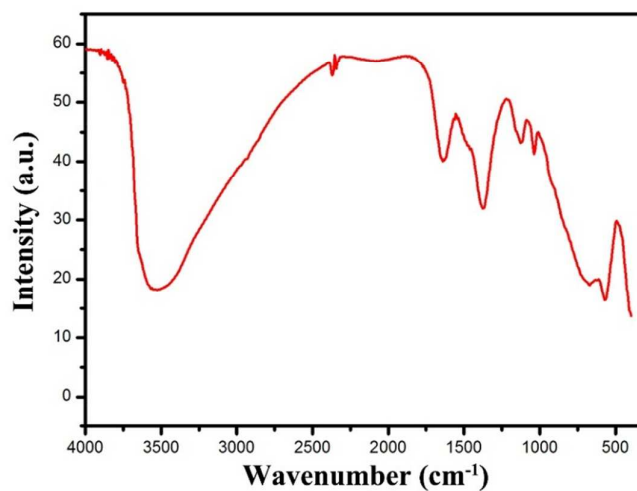

**Figure S3.** FTIR spectrum of the synthesized  $\alpha$ -Ni(OH)<sub>2</sub>.

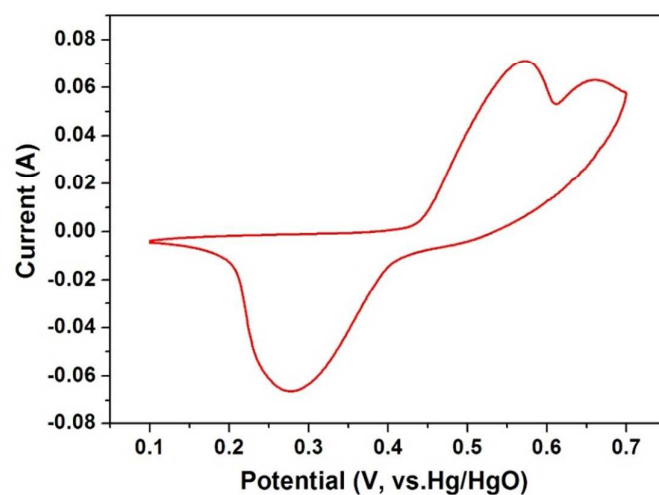

**Figure S4.** Cyclic voltammetry curves of the synthesized  $\alpha$ -Ni(OH)<sub>2</sub> with scan rate of 1 mV S<sup>-1</sup>.

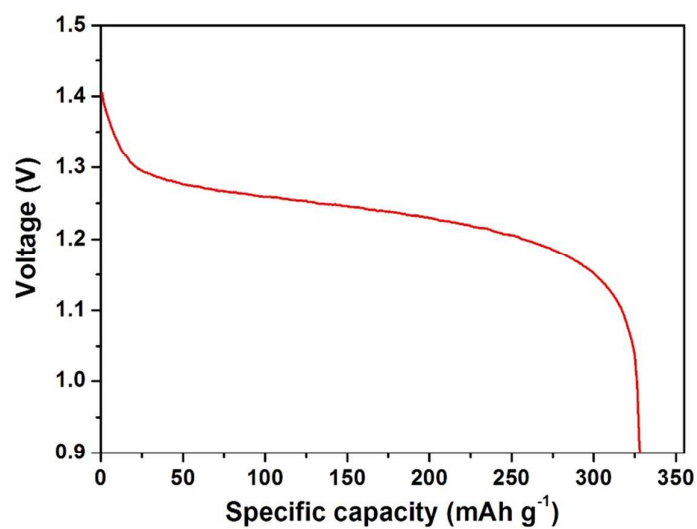

**Figure S5.** Typical discharge curve of the  $\alpha$ -Ni(OH)<sub>2</sub> with hydrogen storage alloy as counter electrode at discharge current density of 30 mA g<sup>-1</sup>.

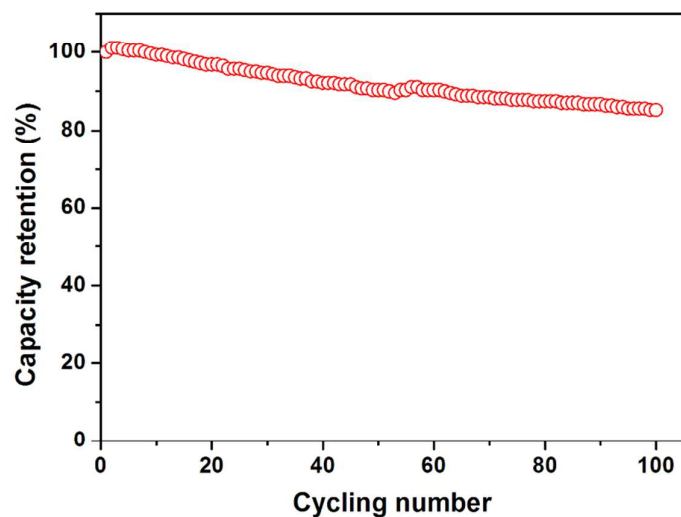

**Figure S6.** Cycling stability of the  $\alpha$ -Ni(OH)<sub>2</sub> investigated at an applied current density of 300 mA g<sup>-1</sup>.

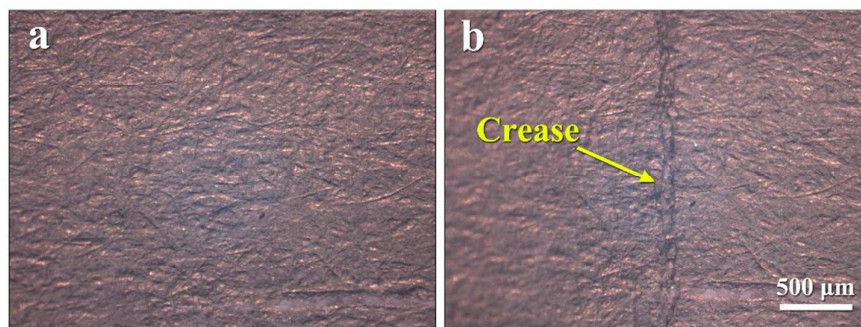

**Figure S7.** Optical microscopy image of the Ag-NW circuit before (a) and after (b) folding.

**Table S1.** Capacity, power density and energy density comparisons of in-plane micro-supercapacitors.

| Electrode materials      | Capacity                  | Power density            | Energy density              | Reference |
|--------------------------|---------------------------|--------------------------|-----------------------------|-----------|
| RuO <sub>x</sub>         | 12.6 mF cm <sup>-2</sup>  | 0.75 mW cm <sup>-2</sup> | 12.5 W h kg <sup>-1</sup>   | [41]      |
| Graphene quantum dots    | 0.535 mF cm <sup>-2</sup> | 7.5 μW cm <sup>-2</sup>  | 0.074 μW h cm <sup>-2</sup> | [42]      |
| CNT                      | 0.43 mF cm <sup>-2</sup>  | 10 mW cm <sup>-2</sup>   | 0.5 μW h cm <sup>-2</sup>   | [43]      |
| rGO                      | 5.5 mF cm <sup>-2</sup>   | 0.45 mW cm <sup>-2</sup> | 0.388 μW h cm <sup>-2</sup> | This work |
| Ni(OH) <sub>2</sub> /rGO | 8.6 mF cm <sup>-2</sup>   | 0.73 mW cm <sup>-2</sup> | 0.669 μW h cm <sup>-2</sup> | This work |
